# Supplementary material for: Three-dimensional flower-like OMS-2 supported Ru catalysts for application in the combustion reaction of o-dichlorobenzene
Source: Royal Society of Chemistry journal article supplement (doi:10.1039/c9cy01361j), 2019-01-01
Supplement: c9cy01361j1.pdf [file c9cy01361j1.pdf]

# **Three-dimensional flower-like OMS-2 supported Ru catalysts for the application in combustion reaction of o-dichlorobenzene**

Sai Yang<sup>a,b</sup>, Haijun Zhao<sup>a</sup>, Fang Dong<sup>a</sup>, Zhicheng Tang<sup>a\*</sup>, Fei Zha<sup>b</sup>

*(a. State Key Laboratory for Oxo Synthesis and Selective Oxidation, and National Engineering*

*Research Center for Fine Petrochemical Intermediates, Lanzhou Institute of Chemical Physics,*

*Chinese Academy of Sciences, Lanzhou, 730000, China*

*b. College of Chemistry and Chemical Engineering, Northwest Normal University, Lanzhou*

*730070, China)*

\*Corresponding author:

Tel.: +86-931-4968083, Fax: +86-931-4968019, E-mail address: tangzhicheng@licp.cas.cn (Z.

Tang).

**Table S1** Textural properties of Ru/OMS-2 catalysts

| Samples                    | $S_{\text{BET}}$ ( $\text{m}^2 \text{g}^{-1}$ ) <sup>a</sup> | $V_{\text{p}}$ ( $\text{cm}^3 \text{g}^{-1}$ ) <sup>b</sup> | $D_{\text{BJH}}$ (nm) <sup>c</sup> |
|----------------------------|--------------------------------------------------------------|-------------------------------------------------------------|------------------------------------|
| Ru/OMS-2-C <sub>low</sub>  | 10.22                                                        | 0.043                                                       | 39.12                              |
| Ru/OMS-2-C <sub>mid</sub>  | 12.29                                                        | 0.058                                                       | 15.47                              |
| Ru/OMS-2-C <sub>high</sub> | 16.86                                                        | 0.089                                                       | 20.36                              |

<sup>a</sup> Determined by BET Surface Area.

<sup>b</sup> Adsorbed volume at  $P/P_0 = 0.995$ .

<sup>c</sup> Determined by desorption branch.

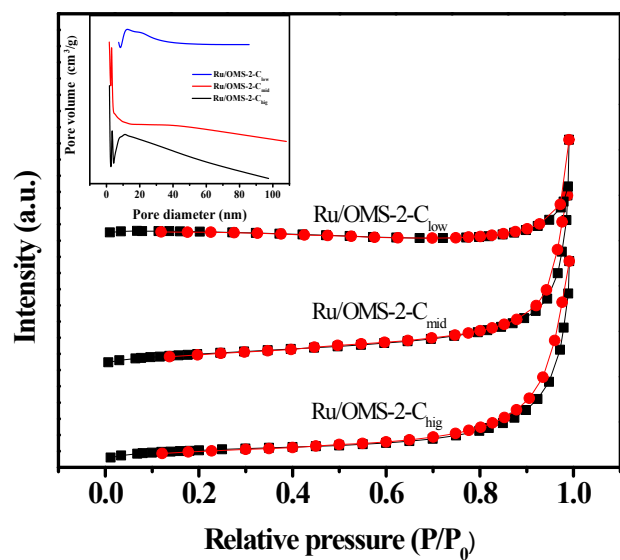

**Fig. S1**  $\text{N}_2$  adsorption-desorption isotherm and pore size distribution plots (inset) of catalysts.

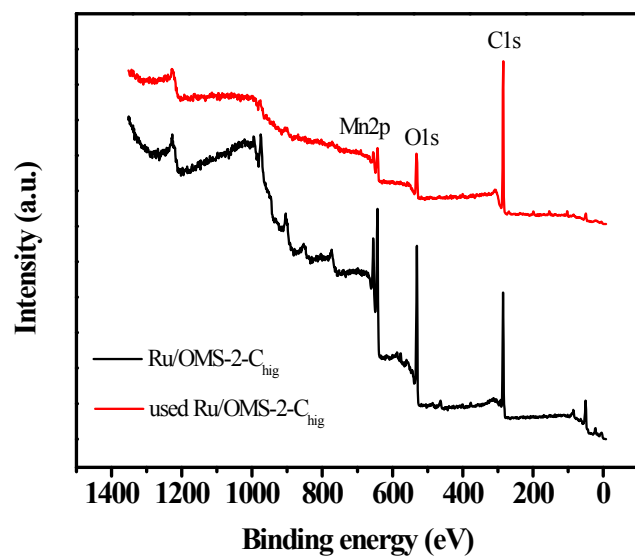

Fig. S2 Survey spectra of fresh and used Ru/OMS-2-C<sub>hig</sub> for XPS.
